# Supplementary material for: Network assessment of demethylation treatment in melanoma: Differential transcriptome-methylome and antigen profile signatures
Source: PubMed Central journal article supplement (PMC6261551; doi:10.1371/journal.pone.0206686), 2018-11-28
Supplement: pone.0206686.s010.pdf [file pone.0206686.s010.pdf]

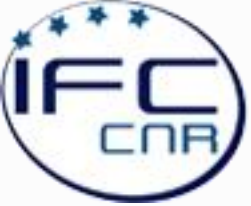

ISTITUTO DI FISILOGIA  
CLINICA

# Analysis of HS294T and SK-MEL-2 cell-lines of Melanoma

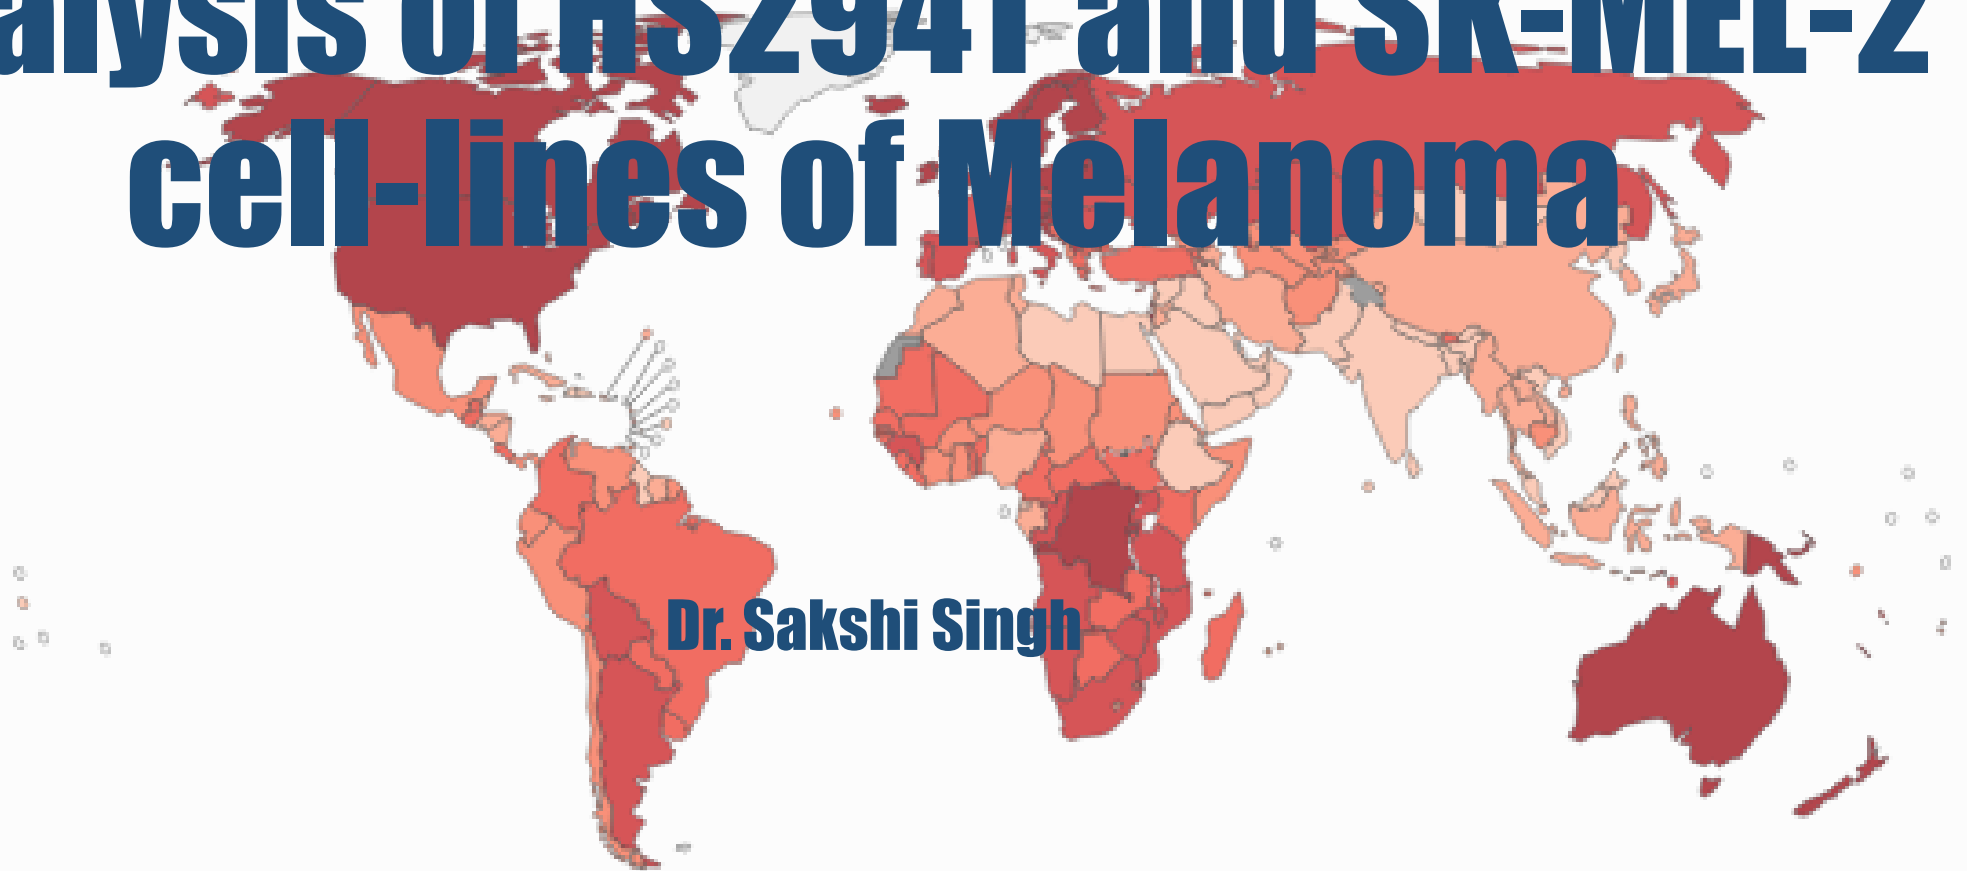

**Dr. Sakshi Singh**

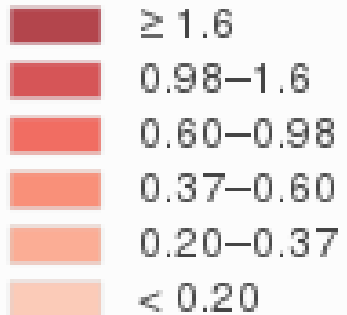

International Agency for Research on Cancer

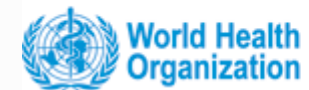

# Intersection of non coding RNAs with our experiment and IncRNome database in HS294T cell line

| linc-RNA  | Targets                                                          | miRNA Bindings                                                                                                                                                                           | Transcript Type      | Gene-ID        |
|-----------|------------------------------------------------------------------|------------------------------------------------------------------------------------------------------------------------------------------------------------------------------------------|----------------------|----------------|
| LINC00324 | CLDN7, KCTD11, SOX15, EFNB3, KDM6B, ALOX12B, ALOXE3, HES7, MYH10 | hsa-miR-27b-5p hsa-miR-33b-3p hsa-miR-3691-3p hsa-miR-378g hsa-miR-4476 hsa-miR-4526 hsa-miR-4652-3p hsa-miR-4779 hsa-miR-493-5p hsa-miR-5589-5p hsa-miR-574-3p hsa-miR-600 hsa-miR-9-5p | ANTISENSE            | HSA-LNCG000124 |
| LINC0327  | TNFRSF19                                                         |                                                                                                                                                                                          | LINC-RNA             | HSA-LNCG003793 |
| SAC-AS1   | SACS                                                             |                                                                                                                                                                                          | LINC-RNA             | HSA-LNCG002623 |
| TP53TG1   | STEAP4                                                           |                                                                                                                                                                                          | PROCESSED-TRANSCRIPT | HSA-LNCG000155 |
| MIAT      | 0                                                                |                                                                                                                                                                                          | PT                   | HSA-LNCG001345 |

# Target genes of LINC00324 non coding RNA that can be controlled with miRNA in HS294T cell line

| ID      | logFC  | Gene Name                                              | Functions                                                                                                                                                                                                                                            |
|---------|--------|--------------------------------------------------------|------------------------------------------------------------------------------------------------------------------------------------------------------------------------------------------------------------------------------------------------------|
| CLDN7   | 6.690  | Claudin 7                                              | Negative Regulation Of Cell Adhesion, Positive Regulation Of Cell Proliferation, Calcium-independent Cell-cell Adhesion Via Plasma Membrane Cell-adhesion Molecules, Negative Regulation Of Apoptotic Process, Positive Regulation Of Cell Motility, |
| SOX15   | 4.893  | Sry-box 15                                             | Negative Regulation Of Transcription From RNA Polymerase II Promoter, Positive Regulation Of Myoblast Proliferation,                                                                                                                                 |
| ALOX12B | 4.421  | Arachidonate 12-lipoxygenase, 12R Type                 | Protein Lipidation, Positive Regulation Of MAPK Cascade, Establishment Of Skin Barrier, Positive Regulation Of Mucus Secretion                                                                                                                       |
| ALOXE3  | 2.672  | Arachidonate Lipoxygenase 3                            | Sphingolipid Metabolic Process, Sensory Perception Of Pain, Lipoxygenase Pathway, Peroxisome Proliferator Activated Receptor Signaling Pathway, Fat Cell Differentiation, Establishment Of Skin Barrier,                                             |
| HES7    | 2.655  | Hes Family Bhlh Transcription Factor 7                 | Negative Regulation Of Transcription From RNA Polymerase II Promoter, Transcription, Dna-templated, Notch Signaling Pathway, Mesoderm Development, Regulation Of Somitogenesis                                                                       |
| KCTD11  | 1.251  | Potassium Channel Tetramerization Domain Containing 11 | Negative Regulation Of Neuroblast Proliferation, Protein Ubiquitination, Negative Regulation Of Smoothened Signaling Pathway                                                                                                                         |
| KDM6B   | 1.117  | Lysine Demethylase 6B                                  | Inflammatory Response To Antigenic Stimulus, Endothelial Cell Differentiation, Positive Regulation Of Transcription From RNA Polymerase II Promoter, Mesodermal Cell Differentiation, Histone H3-K27 Demethylation,                                  |
| MYH10   | -1.100 | Myosin Heavy Chain 10                                  | Mitotic Cytokinesis, Exocytosis, Cell Adhesion, Cell Proliferation, Regulation Of Cell Shape                                                                                                                                                         |
| EFNB3   | -1.523 | Ephrin B3                                              | Cell-cell Signaling, T Cell Costimulation, Ephrin Receptor Signaling Pathway                                                                                                                                                                         |

# **Summary of Target DEGs of lincRNA in SK-MEL-2 cell line (1MB distance from locus)**

- **There are 69 targets of non-coding RNAs in SK-MEL-2 cell line.**
- **Upregulated expression of KLHDC8A, the encoded protein may provide an alternative pathway for tumors to maintain aggressiveness in the absence of epidermal growth factor receptor dependence**
- **Marginal Zone B And B1 (MZB1) cause cell Specific Protein regulation of apoptosis, hormone-regulated chronic inflammation, affects cellular expansion and blunting insulin response in adipocytes.**
- **Tumor necrosis factor receptor superfamily, member 25(TNFRSF25) is an important gene as its involved in apoptosis.**
- **myxovirus resistance 1 (MX2) or interferon-inducible protein p78 (mouse) induces apoptosis.**

# Intersection of non coding RNAs with our experiment and IncRNome database in SK-MEL-2 cell line

| NAME                       | GENE ID        | TRANSCRIPT TYPE      | TARGET GENES                                  |
|----------------------------|----------------|----------------------|-----------------------------------------------|
| XIST                       | HSA-LNCG002710 | processed transcript | 0                                             |
| MIAT                       | HSA-LNCG001345 | processed transcript | 0                                             |
| LINC00174                  | HSA-LNCG000129 | lincRNA              | 0                                             |
| LINC00337                  | HSA-LNCG001097 | antisense            | KCNAB2,CHD5,GPR153,HES2,ESPN,TNFRSF25,PLEKHG5 |
| LINC00460                  | HSA-LNCG003989 | lincRNA              | EFNB2                                         |
| LINC00472                  | HSA-LNCG003887 | processed transcript | 0                                             |
| LINC00479                  | HSA-LNCG004956 | processed transcript | MX2,MX1                                       |
| LINC00518(2MB of distance) | HSA-LNCG000167 | processed transcript | ERVFRD-1                                      |

# **Intersection of non coding RNAs with our experiment and IncRNome database in SK-MEL-2 cell line**

- There are only 8 non coding RNAs that are also reported in databases.
- Among these non-coding RNAs only one LINC00337 is having target genes within the 1Mb of distance from locus.
- There are 7 target gene KCNAB2, CHD5, GPR153, HES2, ESPN, TNFRSF25, PLEKHG5. Among these 6 genes are up-expressed and only 1 KCNAB2 is down-expressed.
- KCNAB2 promotes expression of the pore-forming alpha subunits at the cell membrane, and thereby increases channel activity and also promotes potassium channel closure via a mechanism that does not involve physical obstruction of the channel pore, Promotes KCNA4 channel closure. Modulates the functional properties of KCNA5. Enhances KCNB2 channel activity. Binds NADPH and has NADPH-dependent aldoketoreductase activity. regulating neurotransmitter release, heart rate, insulin secretion, neuronal excitability, epithelial electrolyte transport, smooth muscle contraction, and cell volume.
- CHD5 gene is a potential tumor suppressor gene that may play a role in the development of neuroblastoma. Tumor suppressor, it regulates the expression of genes involved in cell proliferation and differentiation. Downstream activated genes may include CDKN2A that positively regulates the p53/TP53 pathway, which in turn, prevents cell proliferation.
- GPR153 and HES2 are involved in transcription activity while TNFRSF25 induces apoptosis. PLEKHG5 is involved in signal transducer activity and Rho guanyl-nucleotide exchange factor activity.
- ESPN Plays a major role in regulating the organization, dimensions, dynamics and signaling capacities of the actin filament-rich, microvillus-type specializations that mediate sensory transduction in various mechanosensory and chemosensory cells.
