# Supplementary material for: Network assessment of demethylation treatment in melanoma: Differential transcriptome-methylome and antigen profile signatures
Source: PubMed Central journal article supplement (PMC6261551; doi:10.1371/journal.pone.0206686), 2018-11-28
Supplement: pone.0206686.s011.pdf [file pone.0206686.s011.pdf]

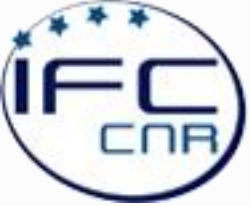

ISTITUTO DI FISILOGIA  
CLINICA

# Analysis of HS294T and SK-MEL-2 cell-lines of Melanoma

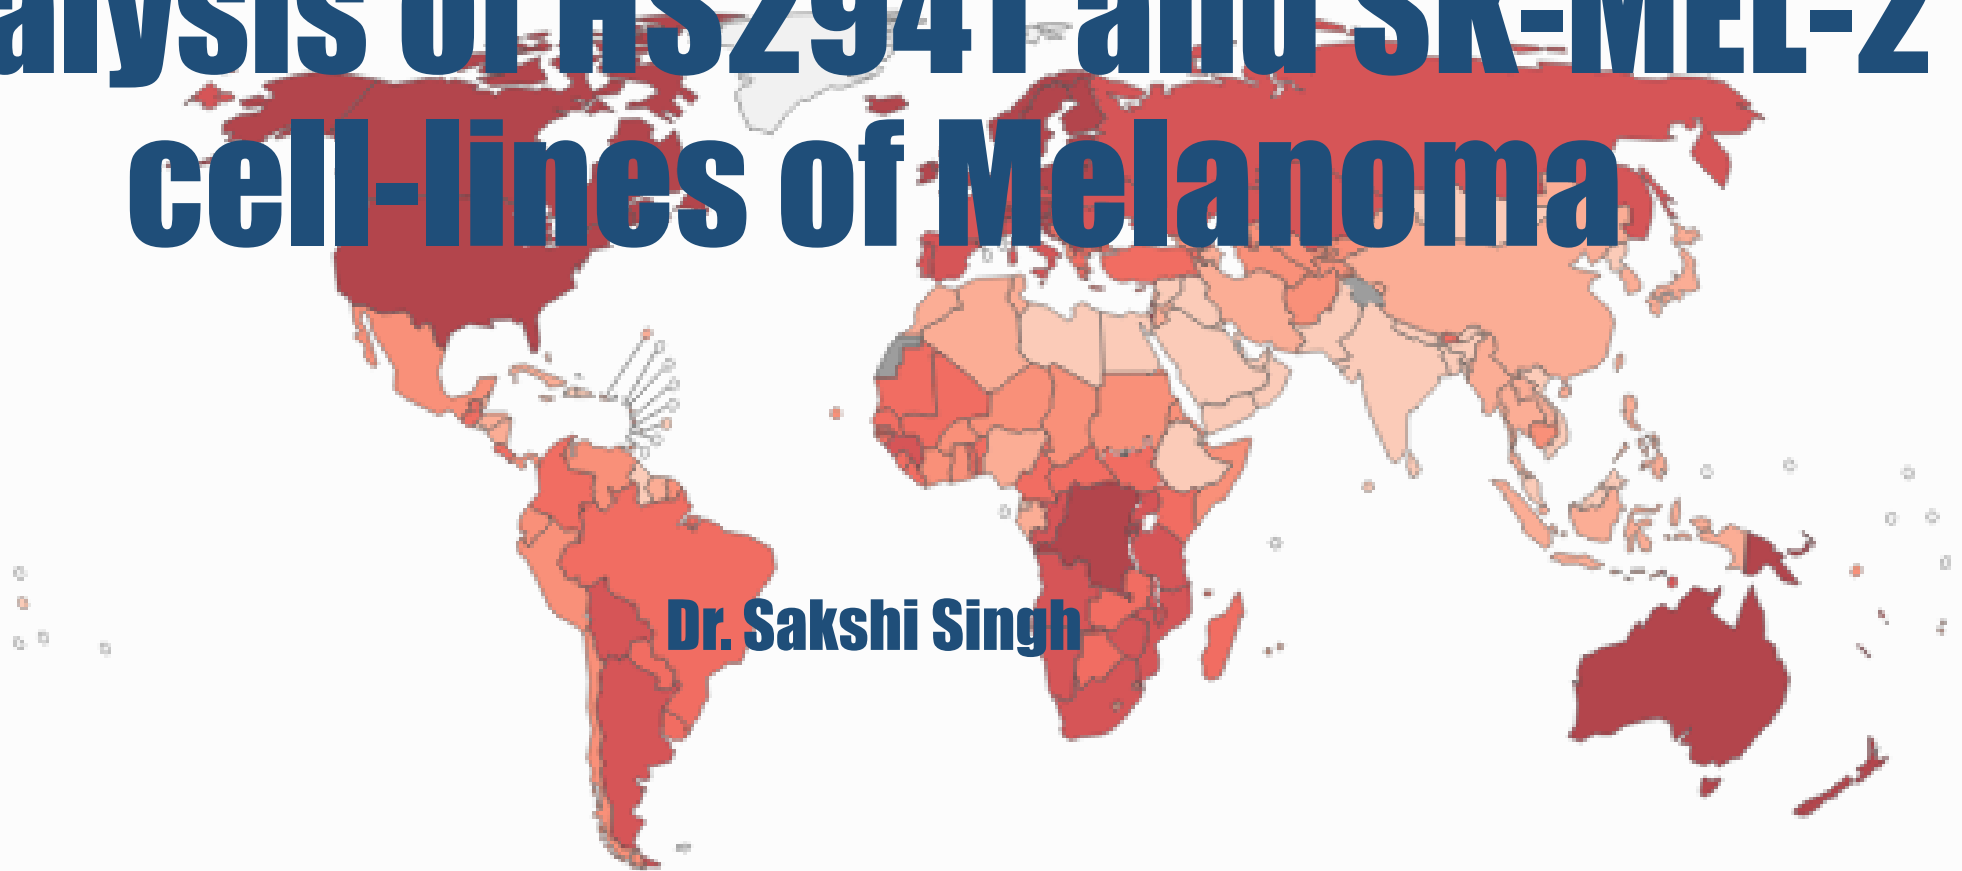

**Dr. Sakshi Singh**

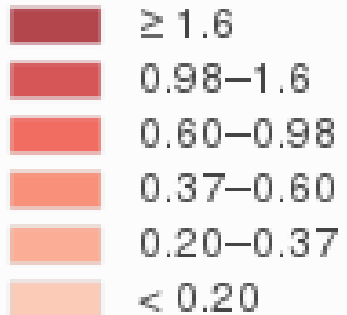

International Agency for Research on Cancer

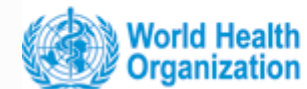

# Genes CONFIRMED In Chromatin Modeling HS294T cell line from DAnCER (Disease Annotated Chromatin Epigenetics Resource)-1

| ID        | logFC | Gene Name                                       | Function                                                   | ID         | logFC | Gene Name                                                        | Function                                                                                                |
|-----------|-------|-------------------------------------------------|------------------------------------------------------------|------------|-------|------------------------------------------------------------------|---------------------------------------------------------------------------------------------------------|
| H2AFB2    | 8.83  | H2A histone family, member B2                   | DNA packaging,chromatin organization                       | HIST1H2BJ  | 3.043 | Histone cluster 1, h2bj                                          | DNA packaging, chromatin organization                                                                   |
| CTCF      | 8.672 | CCCTC-binding factor (zinc finger protein)-like | DNA metabolic process, DNA modification                    | SERPIND1   | 2.828 | Serpin peptidase inhibitor, clade D (heparin cofactor), member 1 | Chemotaxis, blood coagulation, hemostasis, response to chemical stimulus                                |
| SYCP3     | 5.631 | Synaptonemal complex protein 3                  | M phase, reproductive developmental process, DNA packaging | HIST1H4H   | 2.695 | Histone cluster 1, h4h                                           | Regulation of immune system process, DNA packaging, negative regulation of myeloid cell differentiation |
| AURKC     | 4.477 | Aurora kinase C                                 | cytokinesis, protein modification process                  | HIST1H2AE  | 2.655 | Histone cluster 1, h2ae                                          | DNA packaging, chromatin organization                                                                   |
| HIST1H2BG | 3.665 | Histone cluster 1, h2bg                         | DNA packaging, chromatin organization                      | HIST2H2AA3 | 2.443 | Histone cluster 2, h2aa3                                         | DNA packaging, chromatin organization                                                                   |
| HIST1H3D  | 3.146 | Histone cluster 2, h3d                          | DNA packaging, chromatin organization                      | HIST2H2AA4 | 2.443 | Histone cluster 2, h2aa4                                         | DNA packaging, chromatin organization                                                                   |

# Genes CONFIRMED In Chromatin Modeling HS294T cell line from DAnCER (Disease Annotated Chromatin Epigenetics Resource)-2

| ID        | logFC | Gene Name                            | Function                                                           | ID        | logFC  | Gene Name                                | Function                                                                         |
|-----------|-------|--------------------------------------|--------------------------------------------------------------------|-----------|--------|------------------------------------------|----------------------------------------------------------------------------------|
| HIST1H2BC | 2.441 | Histone cluster 1, h2bc              | DNA packaging, chromatin organization                              | HIST1H2BD | 1.555  | Histone cluster 1, h2bd                  | DNA packaging, chromatin organization                                            |
| HIST3H2A  | 1.804 | Histone cluster 3, h2a               | DNA packaging, chromatin organization                              | NKX3-1    | 1.546  | NK3 homeobox 1                           | Nucleobase metabolic process, transcription                                      |
| H2AFJ     | 1.795 | H2A histone family, member J         | DNA packaging, chromatin organization                              | HIST1H2BK | 1.499  | Histone cluster 1, h2bk                  | DNA packaging, chromatin organization                                            |
| TUBA4A    | 1.75  | Tubulin, alpha 4a                    | Protein complex assembly, microtubule-based movement               | KAT2B     | -1.509 | K(lysine) acetyltransferase 2B           | Chromatin organization, n-terminal protein amino acid acetylation                |
| HIST1H1C  | 1.673 | Histone cluster 1, h1c               | DNA packaging, chromatin organization                              | MGAM      | -1.723 | Maltase-glucoamylase (alpha-glucosidase) | Polysaccharide catabolic process                                                 |
| PADI4     | 1.624 | Peptidyl arginine deiminase, type IV | Citrulline metabolic process                                       | ZEB2      | -1.77  | Zinc finger e-box binding homeobox 2     | Ameboidal cell migration, regulation of protein amino acid phosphorylation       |
| MUC1      | 1.561 | Mucin 1, cell surface associated     | Reproduction, response to vitamin A, response to chemical stimulus | LMNB1     | -1.906 | Lamin B1                                 | Regulation of activated pak-2p34 by proteasome mediated degradation <sup>9</sup> |

# **Genes CONFIRMED In Chromatin Modeling HS294T cell line from DAnCER (Disease Annotated Chromatin Epigenetics Resource)**

- I found 40 genes that are being also reported in DAnCER to be involved in chromatin modelling in treated HS294T melanoma cell-line with demethylating drug.
- Many of these genes are highly differentially expressed 22 genes highly up-expressed while 4 highly down-expressed ( $-1.5 > \log_{2}FC > +1.5$ ).
- The genes like H2AFB2, CTCFL, SYCP3, AURKC, HIST1H2BG, HIST1H3D, HIST1H2BJ, SERPIND1 are among the highly up-expressed genes.
- KAT2B, ZEB2, MGAM, LMNB1 are highly down expressed genes.
- Other than being involved in DNA packaging and chromatin modelling, these genes are also known to be playing role in cancer, for example SERPIN family is involved in metastasis of cancer.
- Among down expressed genes, LMNB1 is regulate PAK-2p34 by protease mediated degradation, MGAM is involved in metabolism and immune system, ZEB2 is involved in TGF beta signalling pathway and microRNAs, KAT2B play role in SMAD2/3 signalling.<sup>4</sup>

# Genes CONFIRMED In Chromatin Modeling SK-MEL-2 cell line from DAnCER (Disease Annotated Chromatin Epigenetics Resource)-1

| ID        | logFC | Gene Name                             | Functions                                                                                  | ID         | logFC | Gene Name                                     | Functions                                                                     |
|-----------|-------|---------------------------------------|--------------------------------------------------------------------------------------------|------------|-------|-----------------------------------------------|-------------------------------------------------------------------------------|
| H2AFB2    | 6.180 | H2A histone family member B2          | DNA binding, protein heterodimerization activity,                                          | CPA4       | 2.791 | carboxypeptidase A4                           | metallocarboxypeptidase activity                                              |
| SYCP3     | 6.129 | synaptonemal complex protein 3        | DNA binding                                                                                | CTCF       | 2.538 | CCCTC-binding factor like                     | RNA polymerase II core promoter proximal region sequence-specific DNA binding |
| TUBA4A    | 3.868 | tubulin alpha 4a                      | GTPase activity                                                                            | HIST1H2BC  | 2.184 | histone cluster 1 H2B family member c         | DNA binding                                                                   |
| HIST1H2AG | 3.583 | histone cluster 1 H2A family member g | DNA binding                                                                                | HIST2H2AA3 | 2.182 | histone cluster 2 H2A family member a3        | DNA binding                                                                   |
| SERPIND1  | 3.527 | serpin family D member 1              | serine-type endopeptidase inhibitor activity                                               | HIST2H2AA4 | 2.182 | histone cluster 2 H2A family member a4        | DNA binding                                                                   |
| HIST1H2BG | 3.322 | histone cluster 1 H2B family member g | DNA binding                                                                                | TLE4       | 2.139 | transducin like enhancer of split 4           | chromatin binding                                                             |
| HIST1H4H  | 3.182 | histone cluster 1 H4 family member h  | DNA binding                                                                                | HIST1H2BJ  | 2.088 | histone cluster 1 H2B family member j         | DNA binding                                                                   |
| HIST1H2AI | 2.997 | histone cluster 1 H2A family member i | DNA binding                                                                                | PCSK4      | 2.048 | proprotein convertase subtilisin/kexin type 4 | serine-type endopeptidase activity                                            |
| MUC1      | 2.937 | mucin 1, cell surface associated      | RNA polymerase II core promoter proximal region sequence-specific DNA binding, p53 binding | H1F0       | 2.019 | H1 histone family member 0                    | chromatin DNA binding                                                         |

# Genes CONFIRMED In Chromatin Modeling SK-MEL-2 cell line from DAnCER (Disease Annotated Chromatin Epigenetics Resource)-2

| ID        | logFC | Gene Name                             | Functions                                                                                       | ID       | logFC  | Gene Name                                      | Functions                                                      |
|-----------|-------|---------------------------------------|-------------------------------------------------------------------------------------------------|----------|--------|------------------------------------------------|----------------------------------------------------------------|
| HIST1H3H  | 1.766 | histone cluster 1 H3 family member h  | nucleosomal DNA binding                                                                         | HIST1H1C | 1.061  | histone cluster 1 H1 family member c           | chromatin DNA binding                                          |
| HIST1H3D  | 1.698 | histone cluster 1 H3 family member d  | nucleosomal DNA binding                                                                         | CDK2AP1  | -1.066 | cyclin dependent kinase 2 associated protein 1 | DNA polymerase binding                                         |
| NKX3-1    | 1.478 | NK3 homeobox 1                        | transcription factor activity, MADS box domain binding,                                         | NPM1     | -1.097 | nucleophosmin                                  | transcription coactivator activity                             |
| HIST1H2BD | 1.435 | histone cluster 1 H2B family member d | DNA binding                                                                                     | SKI      | -1.107 | SKI proto-oncogene                             | transcriptional repressor activity                             |
| HMGA1     | 1.375 | high mobility group AT-hook 1         | transcriptional activator activity, RNA polymerase II distal enhancer sequence-specific binding | SAP30    | -1.181 | Sin3A associated protein 30                    | transcription corepressor activity                             |
| HIST2H2BE | 1.320 | histone cluster 2 H2B family member e | protein heterodimerization activity                                                             | H1FX     | -1.199 | H1 histone family member X                     | cadherin binding involved in cell-cell adhesion                |
| BCL6      | 1.277 | B-cell CLL/lymphoma 6                 | RNA polymerase II regulatory region sequence-specific DNA binding                               | PHF2     | -1.220 | PHD finger protein 2                           | transcription coactivator activity, methylated histone binding |
| SIRT7     | 1.191 | sirtuin 7                             | chromatin binding, NAD-dependent histone deacetylase activity (H3-K18 specific)                 | LMNB1    | -1.284 | lamin B1                                       | phospholipase binding                                          |

# **Genes CONFIRMED In Chromatin Modeling SK-MEL-2 cell line from DAnCER (Disease Annotated Chromatin Epigenetics Resource)**

- I found 34 genes that are being also reported in DAnCER to be involved in chromatin modelling in treated SK-MEL-2 melanoma cell-line with demethylating drug.
- Among these 34 genes 19 genes are recurrent with HS294T cell-line.
- These 15 genes exclusively involved in chromatin modeling in SK-MEL-2 are SIRT7, PCSK4, H1FO, BCL6, SAP30, HIST1H3D, TLE4 etc.
- SIRT7 has been found to involved in many processes like aging, cancer and circadian rhythms also.
- BCL6 is involved in immune system and is a transcriptional repressor.

# Putative Chromatin Modeling In Melanoma And Skin Neoplasm in HS294T cell line DAnCER (Disease Annotated Chromatin Epigenetics Resource)

| Melanoma Gene ID | Gene Name                             | logFC  | Functions                                                                          |
|------------------|---------------------------------------|--------|------------------------------------------------------------------------------------|
| SOX10            | SRY (Sex Determining Region Y)-Box 12 | -1.094 | ERK Signaling, Neural Stem Cell Differentiation Pathways, Lineage-specific Markers |
| POU3F2           | POU Class 3 Homeobox 2                | -1.549 | Somatic Malignant Melanoma, transcription factor activity                          |

| Skin Neoplasm Gene ID | Gene Name                                       | logFC  | Functions                                                                          |
|-----------------------|-------------------------------------------------|--------|------------------------------------------------------------------------------------|
| SOX10                 | SRY (Sex Determining Region Y)-Box 12           | -1.094 | ERK Signaling, Neural Stem Cell Differentiation Pathways, Lineage-specific Markers |
| GLI2                  | Glioma-Associated Oncogene Family Zinc Finger 2 | -1.316 | Pathways in cancer, Wnt Signaling Pathways                                         |
| IRF4                  | Interferon Regulatory Factor 4                  | -1.833 | Interferon gamma signaling and B cell receptor signaling pathway                   |



# Putative Chromatin Modeling In Melanoma And Skin Neoplasm in SK-MEL-2 cell line DAnCER (Disease Annotated Chromatin Epigenetics Resource)

| Melanoma Gene ID | Gene Names              | logFC  | Functions                                                 |
|------------------|-------------------------|--------|-----------------------------------------------------------|
| MC1R             | Melanocortin 1 Receptor | -1.189 | G-protein coupled receptor activity and hormone binding   |
| POU3F2           | POU Class 3 Homeobox 2  | -1.209 | Somatic Malignant Melanoma, transcription factor activity |

| Gene ID | Gene Names                           | logFC  | Disease               | Functions                                                                         |
|---------|--------------------------------------|--------|-----------------------|-----------------------------------------------------------------------------------|
| NOS3    | Nitric Oxide Synthase 3              | 5.174  | Skin Disease          | VEGF Signaling Pathway and Activation of cAMP-Dependent PKA                       |
| ACTA2   | Actin, Alpha 2, Smooth Muscle, Aorta | 4.862  | Vascular Skin Disease | EPHA forward signaling and Arrhythmogenic right ventricular cardiomyopathy (ARVC) |
| GLI1    | GLI Family Zinc Finger 1             | 2.036  | Skin Neoplasm         | Activation of cAMP-Dependent PKA, Pathways in cancer                              |
| MC1R    | Melanocortin 1 Receptor              | -1.189 | Skin Neoplasm         | G-protein coupled receptor activity and hormone binding                           |
